# Supplementary figures and images for: L-plastin Ser5 phosphorylation is modulated by the PI3K/SGK pathway and promotes breast cancer cell invasiveness
Source: Springer Nature journal article supplement (doi:10.1186/s12964-021-00710-5), 2021-02-22

# Figure S2

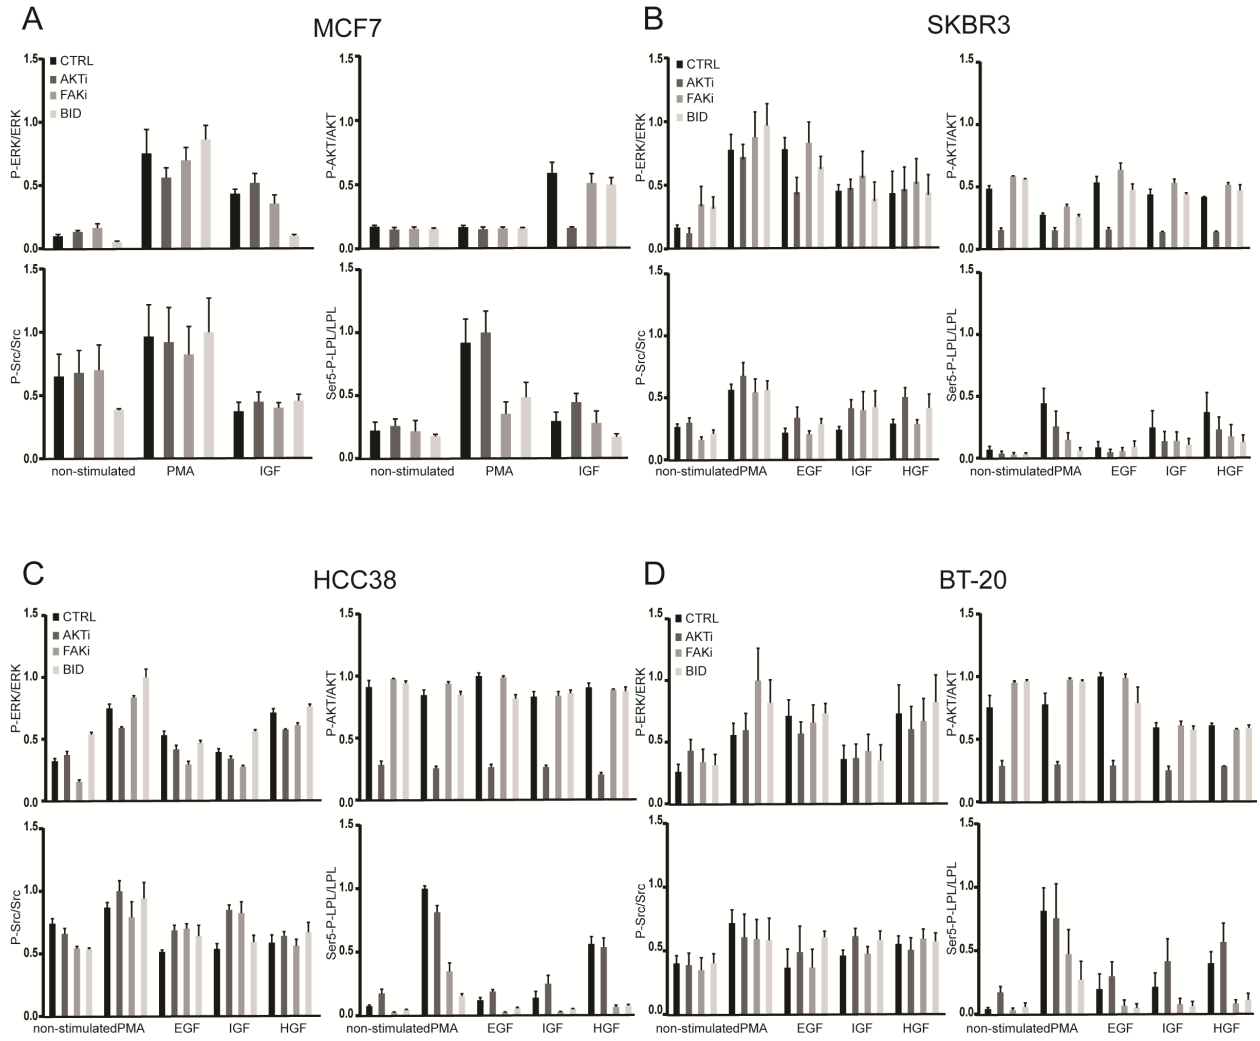

Supplement: MOESM14 [file 12964_2021_710_MOESM14_ESM_Figure%20S2.pdf]

Figure S3

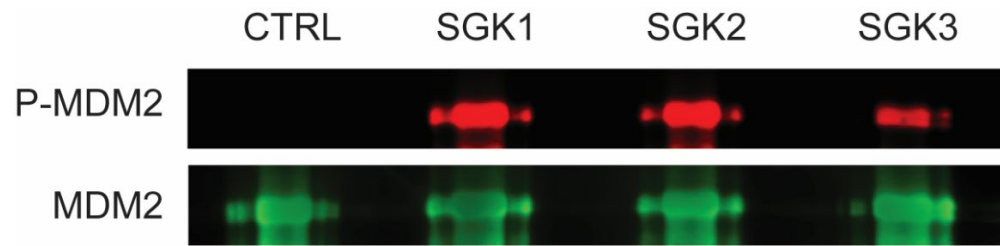

Supplement: MOESM15 [file 12964_2021_710_MOESM15_ESM_Figure%20S3.pdf]
